# Supplementary material
Source: MDPI journal article supplement (https://www.mdpi.com/2410-3888/4/3/46)
Supplement: s1 [file s1]

# Supplementary Materials: <sup>1</sup>H NMR-Based Metabolomics and Lipid Analyses Revealed the Effect of Dietary Replacement of Microbial Extracts or Mussel Meal with Fish Meal to Arctic Charr (*Salvelinus alpinus*)

Liane Wagner <sup>1,†</sup>, Pedro Gómez-Requeni <sup>1,†</sup>, Ali A. Moazzami <sup>1</sup>, Torbjörn Lundh <sup>2</sup>, Aleksandar Vidakovic <sup>2</sup>, Markus Langeland <sup>2</sup>, Anders Kiessling <sup>2</sup> and Jana Pickova <sup>1,\*</sup>

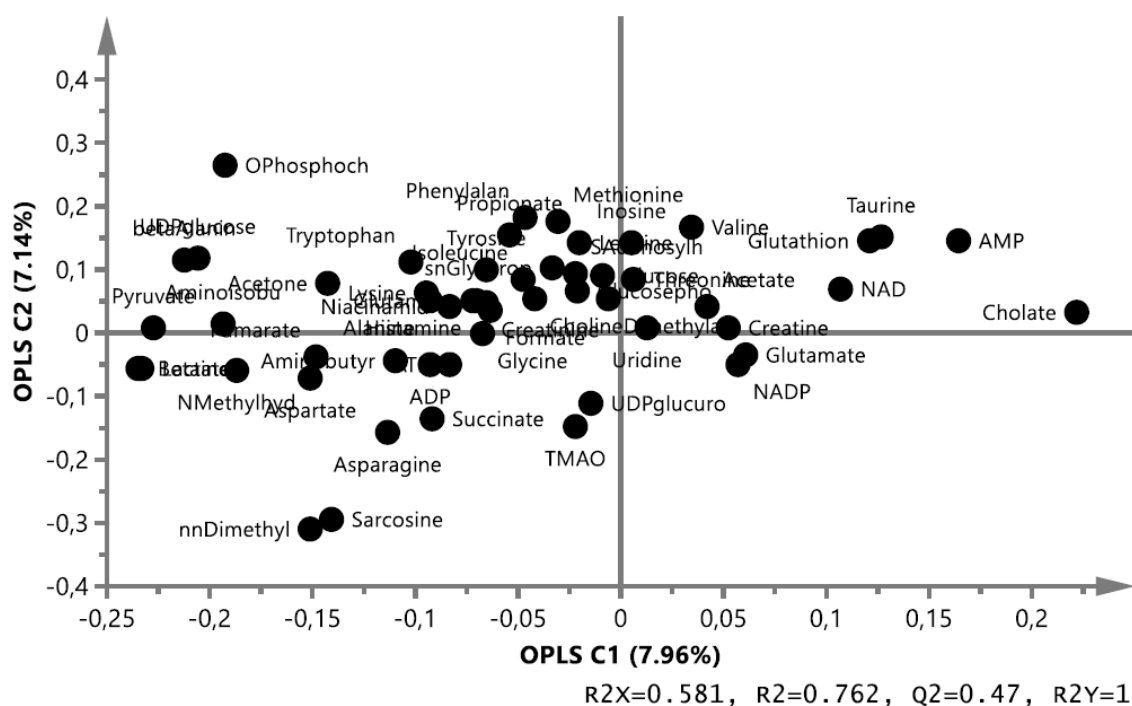

(A)

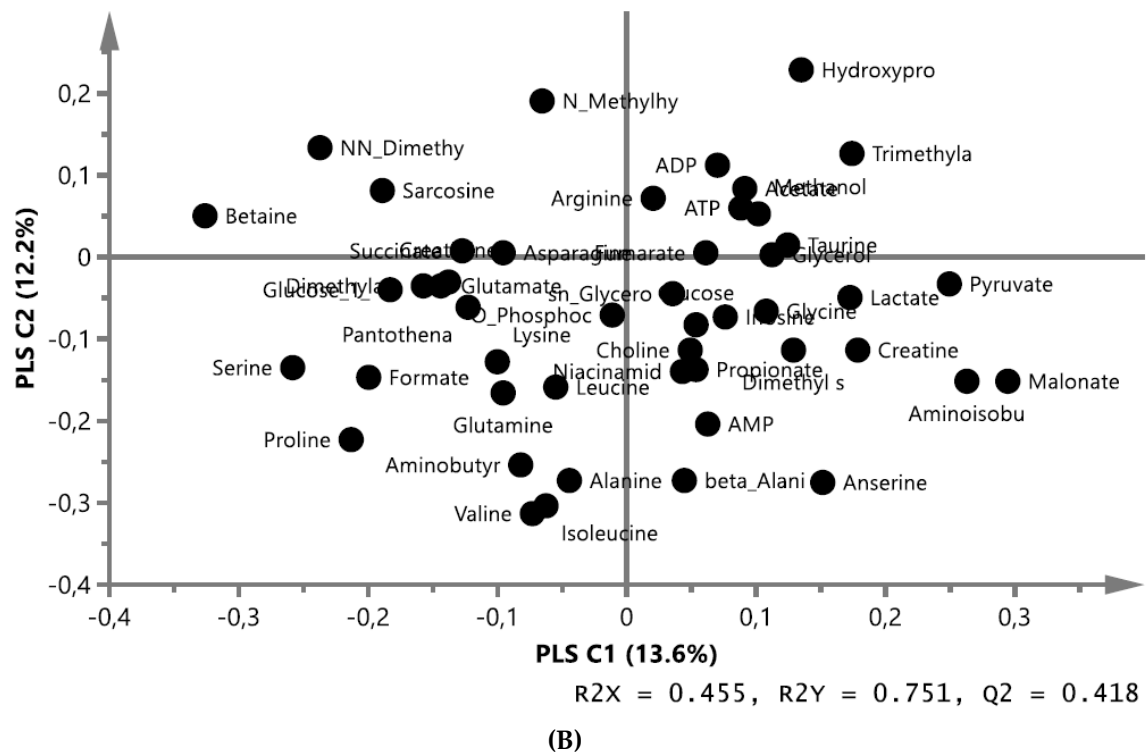

**Figure 5:** Loading plot of orthogonal partial least squares projection to latent structures discriminant analysis (OPLS-DA) and partial least squares projection to latent structures discriminant analysis (PLS-DA) based on metabolites from aqueous (A) liver and (B) muscle extract, respectively, of fish fed reference diet and four experimental diets.
